# Supplementary material for: Oxygen permeation, thermal expansion behavior and electrochemical properties of LaBa0.5Sr0.5Co2O5+δ cathode for SOFCs
Source: Royal Society of Chemistry journal article supplement (doi:10.1039/c7ra00125h), 2017-01-01
Supplement: c7ra00125h1.pdf [file c7ra00125h1.pdf]

## Oxygen permeation, thermal expansion behavior and electrochemical properties of $\text{LaBa}_{0.5}\text{Sr}_{0.5}\text{Co}_2\text{O}_{5+\delta}$ cathode for SOFCs

Adi Subardi<sup>a,b</sup>, Kun-Yu Liao<sup>a</sup>, Yen-Pei Fu<sup>a,\*</sup>

<sup>a</sup>Departement of Materials Science & Engineering, National Dong Hwa University, Shou-Feng, Hualien 97401, Taiwan

<sup>b</sup>Departement of Mechanical Engineering, STTNAS Yogyakarta 55281, Indonesia

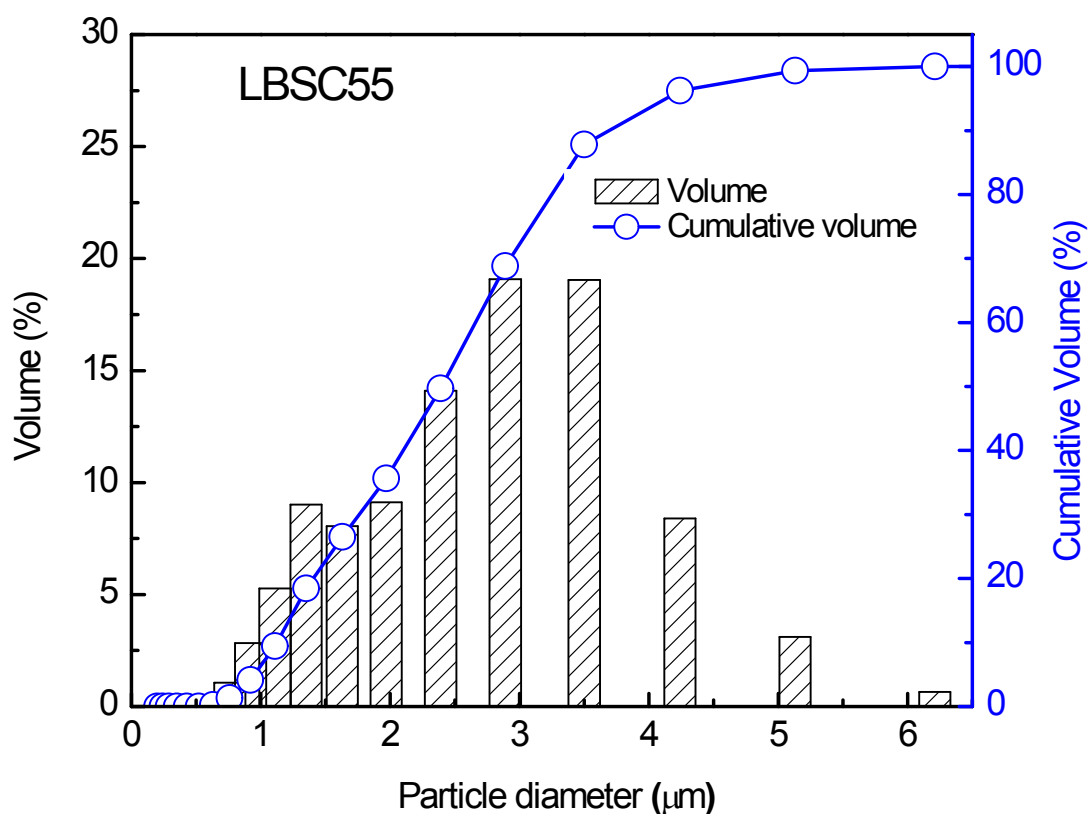

Fig. S1. Particle size distribution of LBSC55 powder prepared by solid-state reaction technique.

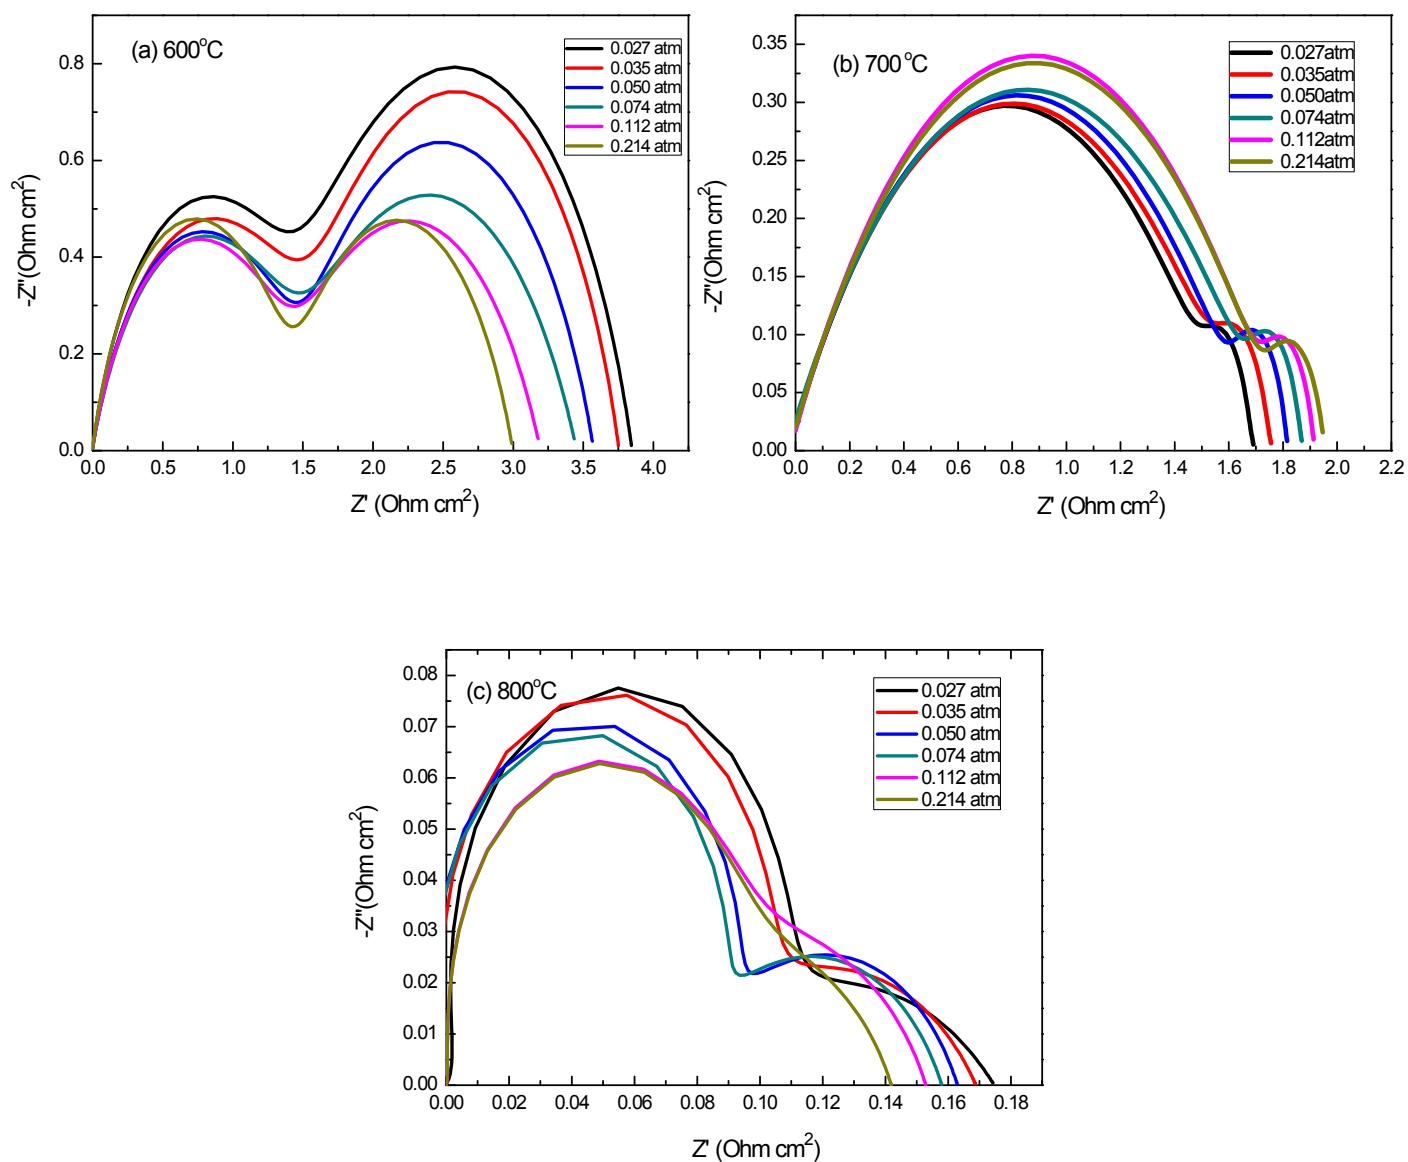

Fig. S2. Nyquist diagram of the impedance spectroscopy for LBSC55 cathode on SDC electrolyte with various oxygen partial pressures at (a) 600 °C; (b) 700 °C; and (c) 800 °C, respectively.

Table S1. Cumulative volume statistics for LBSC55 powder.

| Cumulative volume | Particle diameter ( $\mu\text{m}$ ) |
|-------------------|-------------------------------------|
| D <sub>10</sub>   | 1.12                                |
| D <sub>25</sub>   | 1.57                                |
| D <sub>50</sub>   | 2.40                                |
| D <sub>75</sub>   | 3.08                                |
| D <sub>90</sub>   | 3.65                                |

Table S2. The oxygen content ( $5+\delta$ ) and average Co valence for LBSC55 cathode as function of temperature in air.

|                               | LBSC55 |       |       |       |
|-------------------------------|--------|-------|-------|-------|
|                               | 200°C  | 400°C | 600°C | 600°C |
| Oxygen content ( $5+\delta$ ) | 5.71   | 5.69  | 5.64  | 5.58  |
| Average Co valence            | 3.21   | 3.19  | 3.14  | 3.08  |
